# Supplementary material for: Improvement of dicarboxylic acid production with Methylorubrum extorquens by reduction of product reuptake
Source: Springer Nature journal article supplement (doi:10.1007/s00253-022-12161-0), 2022-09-15
Supplement: MOESM1 [file 253_2022_12161_MOESM1_ESM.pdf]

## Supplementary Information

**Journal: Applied Microbiology and Biotechnology**

**Improvement of dicarboxylic acid production with *Methylobacterium extorquens* by reducing the product reuptake**

Laura Pöschel<sup>1</sup>, Elisabeth Gehr<sup>1</sup>, Markus Buchhaupt<sup>1\*</sup>

<sup>1</sup> DECHEMA-Forschungsinstitut, Microbial Biotechnology, Theodor-Heuss-Allee 25, 60486 Frankfurt am Main, Germany

<sup>2</sup> Department of Life Sciences of the Goethe University Frankfurt am Main, Max-von-Laue-Str. 9, 60438 Frankfurt am Main, Germany

\*Corresponding author, Phone: +49-69-7564-629, e-mail address: markus.buchhaupt@dechema.de

### Electronic supplementary material as Online Resource

**Table S1** Details of genomic sequencing and mapping procedure

**Table S2** Genetic differences between the sequenced strains and the used reference genome

**Fig. S1** Analytical evidence for production of citramalic acid by an *M. extorquens* AM1 strain

**Fig. S2** Dicarboxylic acid production per OD<sub>600</sub> (transformed data from figure 2)

**Fig. S3** Dicarboxylic acid production per OD<sub>600</sub> (transformed data from figure 5)

**Fig. S4** Dicarboxylic acid production per OD<sub>600</sub> (transformed data from figure 6)

**Fig. S5** Dicarboxylic acid production per OD<sub>600</sub> (transformed data from figure 7)

**Fig. S6** Dicarboxylic acid production per OD<sub>600</sub> (transformed data from figure 8)

**Table S1** Details of genomic sequencing and mapping procedure

| Strain                                       | Genetic entity | Total number of mapped Illumina reads | Base coverage of reference sequence | Average base coverage [mean $\pm$ standard deviation] |
|----------------------------------------------|----------------|---------------------------------------|-------------------------------------|-------------------------------------------------------|
| <b><i>M. extorquens</i> AM1 wild type</b>    | NC_012807      | 317 955                               | 100 %                               | 514.6 $\pm$ 186.0                                     |
|                                              | NC_012808      | 17 352 981                            | 99.998 %                            | 225.9 $\pm$ 212.4                                     |
|                                              | NC_012809      | 235 559                               | 100 %                               | 445.3 $\pm$ 141.6                                     |
|                                              | NC_012810      | 180 717                               | 100 %                               | 519.8 $\pm$ 180.6                                     |
|                                              | NC_012811      | 3 828 584                             | 99.99 %                             | 216.9 $\pm$ 70.7                                      |
| <b><i>M. extorquens</i> AM1 DFS mutant 1</b> | NC_012807      | 353 562                               | 100 %                               | 1061.5 $\pm$ 258.9                                    |
|                                              | NC_012808      | 18 846 841                            | 100 %                               | 452.3 $\pm$ 86.2                                      |
|                                              | NC_012809      | 216 117                               | 100 %                               | 764.7 $\pm$ 110.5                                     |
|                                              | NC_012810      | 139 576                               | 100 %                               | 750.8 $\pm$ 101.3                                     |
|                                              | NC_012811      | 4 279 978                             | 99.9998 %                           | 447.9 $\pm$ 76.9                                      |
| <b><i>M. extorquens</i> AM1 DFS mutant 2</b> | NC_012807      | 295 048                               | 100 %                               | 869.9 $\pm$ 195.3                                     |
|                                              | NC_012808      | 15 563 801                            | 100 %                               | 367.0 $\pm$ 83.7                                      |
|                                              | NC_012809      | 166 635                               | 100 %                               | 580.1 $\pm$ 73.9                                      |
|                                              | NC_012810      | 104 196                               | 100 %                               | 550.5 $\pm$ 76.2                                      |
|                                              | NC_012811      | 3 425 166                             | 99.997 %                            | 352.7 $\pm$ 58.6                                      |

**Table S2** Genetic differences between the sequenced strains and the used reference genome. The listed mutations were found in all sequenced strains including *M. extorquens* AM1 wild type. N/A indicates that there is no annotated gene function (annotation date 04/11/2021)

| Genetic entity | Locus tag         | Gene | Polymorphism type  | Change                  | Effect on open reading frame |
|----------------|-------------------|------|--------------------|-------------------------|------------------------------|
| NC_012808      | MEXAM1_RS02205    | N/A  | Insertion          | (C)3 $\rightarrow$ (C)4 | Frame Shift                  |
| NC_012808      | MEXAM1_RS10680    | N/A  | Deletion           | (G)3 $\rightarrow$ (G)2 | Frame Shift                  |
| NC_012808      | MEXAM1_RS34015    | N/A  | SNP (transversion) | T $\rightarrow$ G       | None                         |
| NC_012808      | MEXAM1_RS12610    | N/A  | SNP (transition)   | C $\rightarrow$ T       | None                         |
| NC_012808      | MEXAM1_RS12610    | N/A  | SNP (transition)   | T $\rightarrow$ C       | None                         |
| NC_012808      | MEXAM1_RS13695    | treS | Deletion           | (C)4 $\rightarrow$ (C)3 | Frame Shift                  |
| NC_012808      | MEXAM1_RS14240    | N/A  | Deletion           | (G)3 $\rightarrow$ (G)2 | Frame Shift                  |
| NC_012808      | MEXAM1_RS32900    | N/A  | Deletion           | -TGCCG                  | Frame Shift                  |
| NC_012808      | Intergenic region | N/A  | SNP (transition)   | A $\rightarrow$ G       | None                         |
| NC_012811      | MEXAM1_RS28080    | N/A  | Insertion          | +C                      | Frame Shift                  |
| NC_012811      | MEXAM1_RS29025    | N/A  | Deletion           | (G)3 $\rightarrow$ (G)2 | Frame Shift                  |

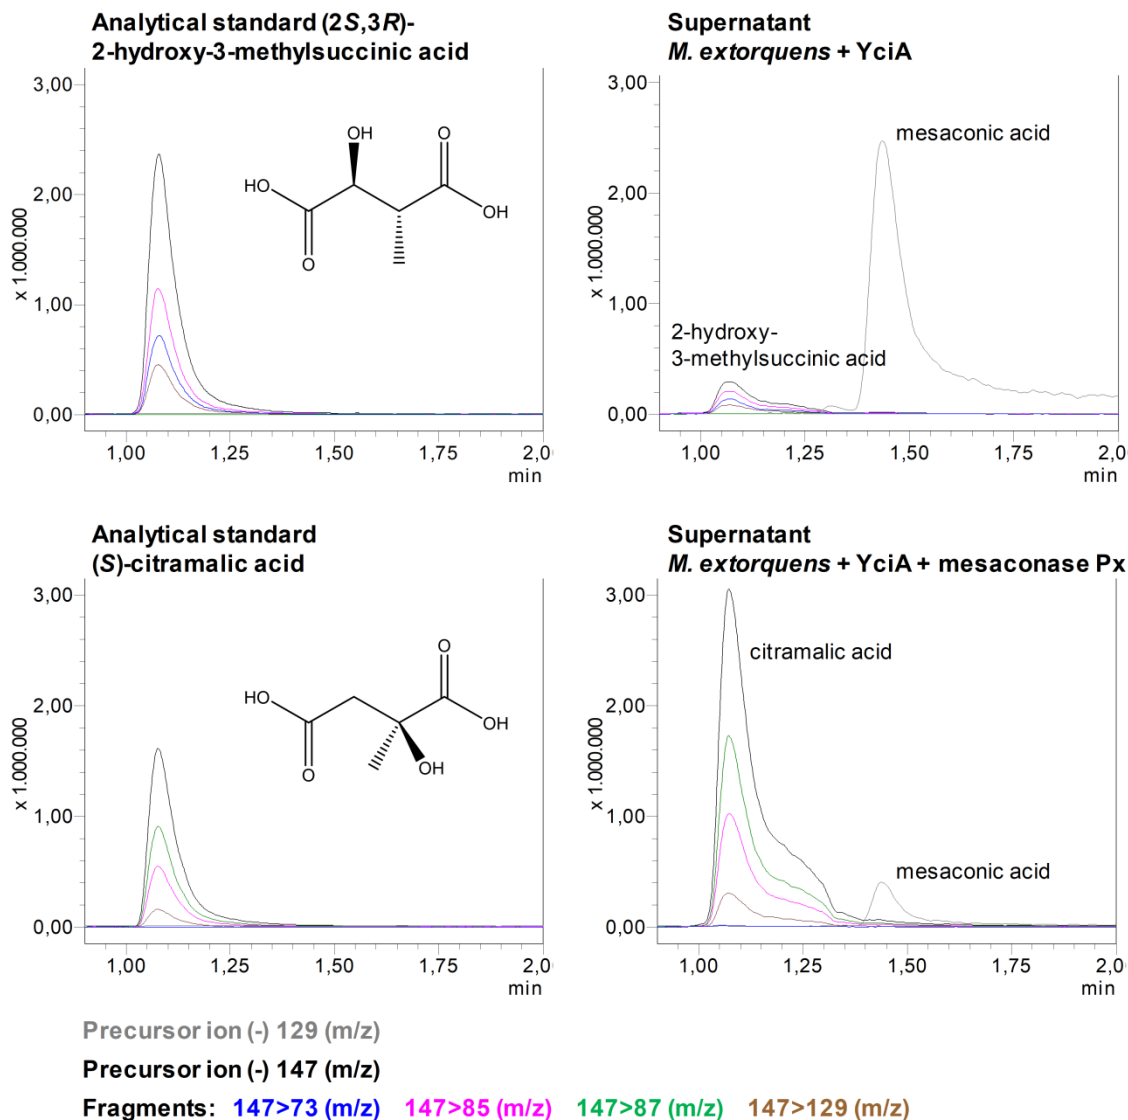

**Fig. S1** Analytical evidence for production of citramalic acid by an *M. extorquens* AM1 strain expressing a mesaconase from *Paraburkholderia xenovorans* (mesaconase\_Px) in addition to YciA from *Haemophilus influenzae*. Shown are chromatograms of precursor 129 m/z (mesaconic acid) and precursor 147 m/z (2-hydroxy-3-methylsuccinic acid or citramalic acid). To distinguish between 2-hydroxy-3-methylsuccinic acid (present at low concentrations in *M. extorquens* AM1 cultures) and citramalic acid, the analytes were fragmented using the identical LC-MS/MS MRM method detecting fragments 73, 85, 129 and 87. Here, the fragment of 87 (m/z) is characteristic for citramalic acid and can therefore be used for unambiguous identification. In supernatant of cultures with *M. extorquens* AM1 expressing thioesterase gene *yciA*, mesaconic acid as well as 2-hydroxy-3-methylsuccinic acid can be detected. With the additional introduction of a mesaconase, the mesaconase peak becomes smaller and conversion to citramalic acid can be observed.

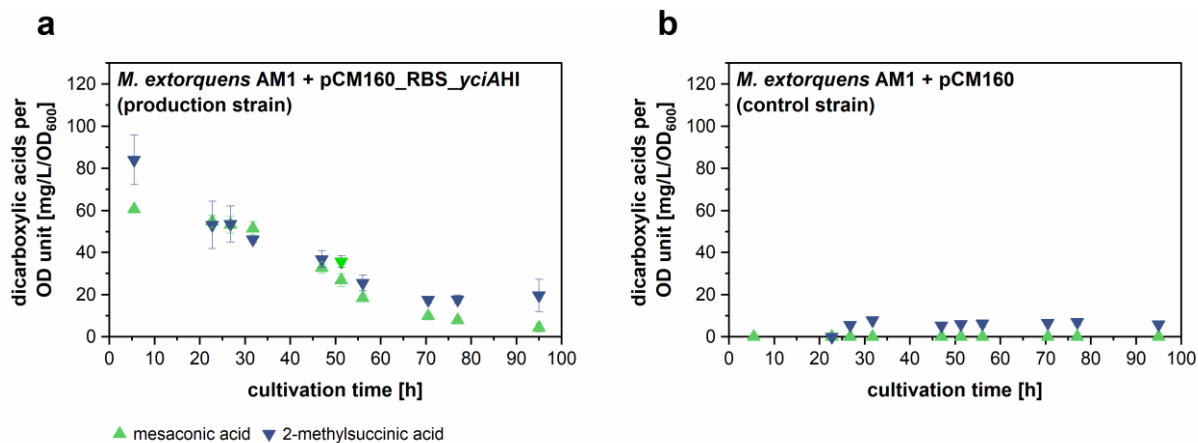

**Fig. S2** Dicarboxylic acid production per OD<sub>600</sub> (transformed data from figure 2). Meseaconic acid and 2-methylsuccinic acid concentrations per OD<sub>600</sub> in supernatant of *M. extorquens* AM1 + pCM160\_RBS\_yciAHI (a) or *M. extorquens* AM1 + pCM160 (b) growing in methanol minimal medium. Error bars represent standard deviations from three independent replicates

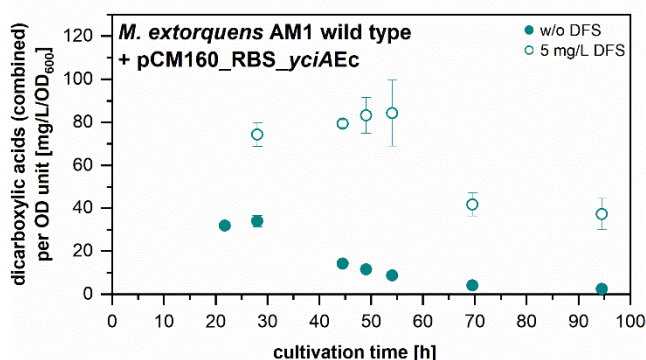

**Fig. S3** Dicarboxylic acid production per OD<sub>600</sub> (transformed data from figure 5). Meseaconic acid and 2-methylsuccinic acid concentrations (combined) per OD<sub>600</sub> in supernatant of *M. extorquens* AM1 harboring pCM160\_RBS\_yciAEc in methanol minimal medium (filled symbols) and in methanol minimal medium with addition of 5 mg/L 2,2-difluorosuccinic acid (DFS) after 5 h of cultivation (empty symbols). Error bars represent standard deviations from two independent replicates

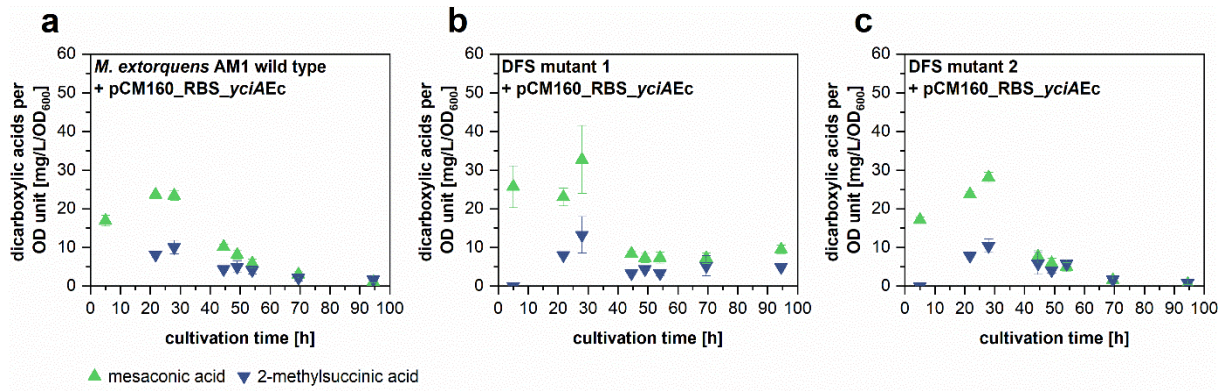

**Fig. S4** Dicarboxylic acid production per OD<sub>600</sub> (transformed data from figure 6). Mesaconic acid and 2-methylsuccinic acid concentrations per OD<sub>600</sub> in supernatant of *M. extorquens* AM1 wild type + pCM160\_RBS\_yciAEc (**a**), DFS mutant 1 + pCM160\_RBS\_yciAEc (**b**) and DFS mutant 2 + pCM160\_RBS\_yciAEc (**c**), growing in methanol minimal medium. Error bars represent standard deviations from three independent replicates

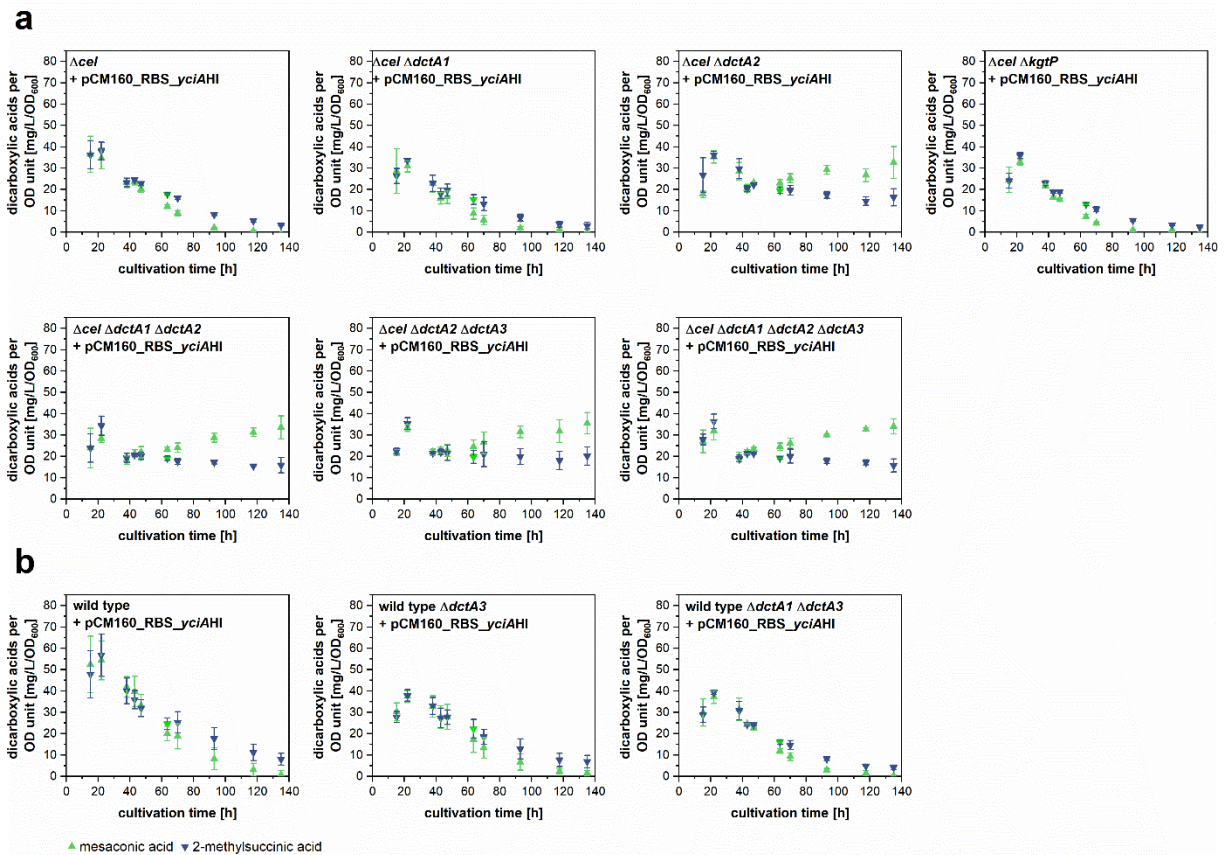

**Fig. S5** Dicarboxylic acid production per OD<sub>600</sub> (transformed data from figure 7). Mesaconic acid and 2-methylsuccinic acid concentrations per OD<sub>600</sub> in supernatant of *M. extorquens* AM1 cells without and with single, double or triple transporter deletions. Strains heterologously express the thioesterase encoding gene *yciAHI* in methanol minimal medium. Error bars represent standard deviations from three independent replicates. Strains were constructed based on either **a** *M. extorquens* AM1 wild type or **b** *M. extorquens* AM1 *Δcel*/strain

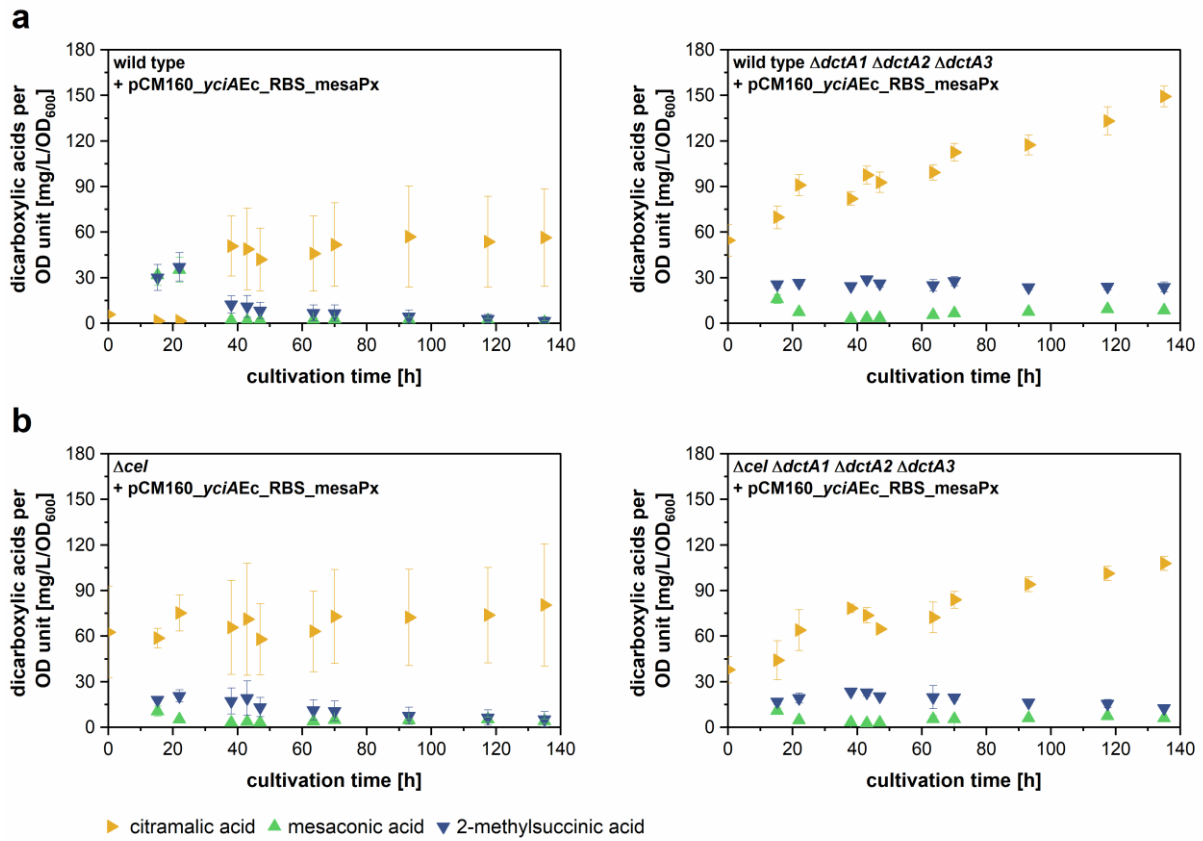

**Fig. S6** Dicarboxylic acid production per OD<sub>600</sub> (transformed data from figure 8). Mesaconic acid, 2-methylsuccinic acid and citramalic acid concentrations per OD<sub>600</sub> in supernatant of *M. extorquens* AM1 wild type and triple *dctA* transporter deletion strain expressing thioesterase encoding gene *yciA*H1 and mesaconase in methanol minimal medium
